# Supplementary material for: Facile synthesis of vacancy-induced 2H-MoS2 nanosheets and defect investigation for supercapacitor application
Source: Royal Society of Chemistry journal article supplement (doi:10.1039/d1ra04902j), 2021-01-01
Supplement: d1ra04902j1.pdf [file d1ra04902j1.pdf]

## Supplementary Information

### Facile synthesis of vacancy-induced 2H-MoS<sub>2</sub> nanosheet and defect investigation for supercapacitor application

Hai Wang<sup>a,b\*</sup>, Xingping Xu<sup>a</sup>, and Anne Neville<sup>b</sup>

<sup>a</sup>: College of Mechanical and Electronic Engineering, China University of Petroleum  
(East China), Qingdao, 266555, China

<sup>b</sup>: Institute of Functional Surfaces, School of Mechanical Engineering, University of  
Leeds, Leeds, LS2 9JT, United Kingdom

\*Corresponding author: Hai Wang, E-mail address: mnhw@leeds.ac.uk

Supplementary information is attached in this section to provide additional evidence for the findings. These include an Comparable CV results of MoS<sub>2</sub>, MoS<sub>2-x</sub>-300, MoS<sub>2-x</sub>-500 and MoS<sub>2-x</sub>-700 (Fig. S1) and total density of states(DOS) of pristine MoS<sub>2</sub>, MoS<sub>2-x</sub> with B-V, MoS<sub>2-x</sub> with Mo-V and (b)MoS<sub>2-x</sub> with S-V (Fig. S2), Comparable XPS spectra of S 2p in MoS<sub>2</sub>, MoS<sub>2-x</sub>-300, MoS<sub>2-x</sub>-500 and MoS<sub>2-x</sub>-700 with quantitative atomic analysis (Fig. S3) and load mass of active material in MoS<sub>2</sub> and MoS<sub>2-x</sub> electrodes (Table S1).

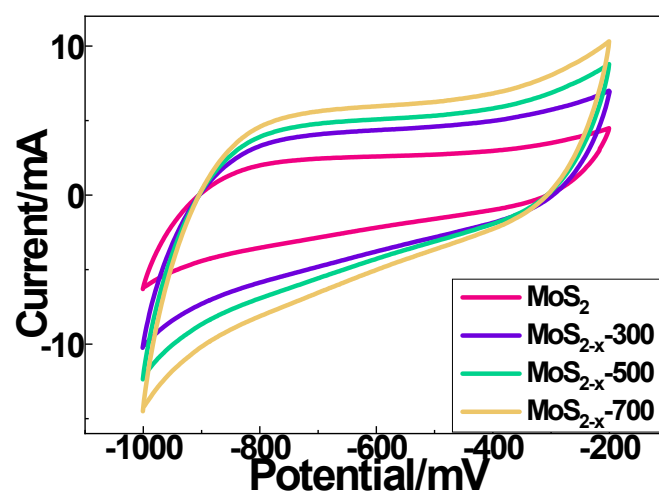

Figure S1 Comparable CV results of MoS<sub>2</sub>, MoS<sub>2-x</sub>-300, MoS<sub>2-x</sub>-500 and MoS<sub>2-x</sub>-700

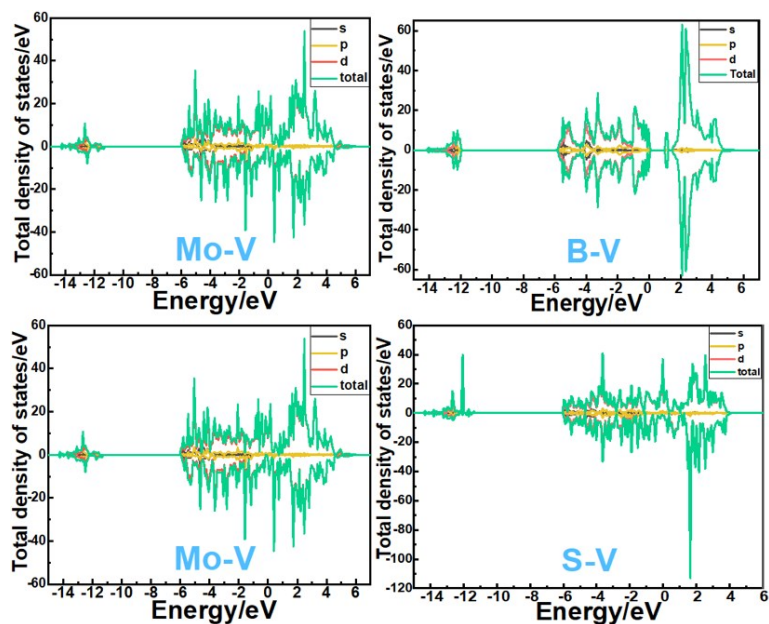

Figure S2 Total density of states (DOS) of pristine  $\text{MoS}_2$ ,  $\text{MoS}_{2-x}$  with B-V,  $\text{MoS}_{2-x}$  with Mo-V and  $\text{MoS}_{2-x}$  with S-V

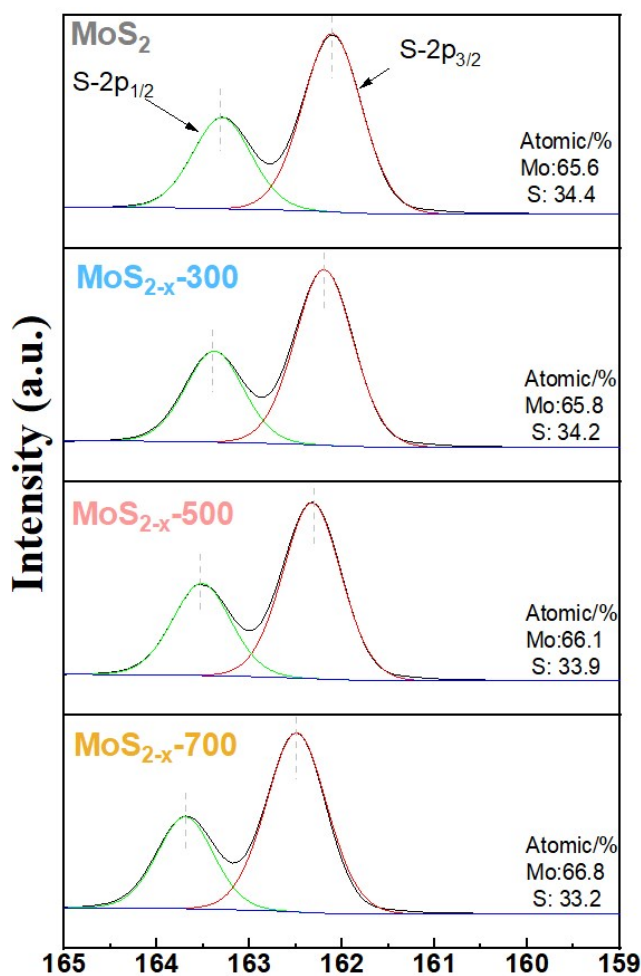

Figure S3 Comparable XPS spectra of S 2p in  $\text{MoS}_2$ ,  $\text{MoS}_{2-x}$ -300,  $\text{MoS}_{2-x}$ -500 and  $\text{MoS}_{2-x}$ -700 and quantitative atomic analysis within the samples

**Table S1 Load mass of active material and specific capacitance measured by mass ratio**

| Electrode               | Load mass (mg) | Capacitance (F) | Current density<br>(A g <sup>-1</sup> ) | Specific<br>Capacitance (F g <sup>-1</sup> ) |
|-------------------------|----------------|-----------------|-----------------------------------------|----------------------------------------------|
| MoS <sub>2</sub>        | 32.1           | 3.13            | 1.0                                     | 97.5                                         |
| MoS <sub>2-x</sub> -300 | 28.5           | 3.41            | 1.0                                     | 119.7                                        |
| MoS <sub>2-x</sub> -500 | 45.4           | 5.97            | 1.0                                     | 131.6                                        |
| MoS <sub>2-x</sub> -700 | 33.7           | 4.81            | 1.0                                     | 142.7                                        |
